# Supplementary material for: Carbon Storage in Coastal Reed Ecosystems
Source: Copernicus journal article supplement (doi:10.5194/egusphere-2025-2368), 2025-06-17
Supplement: Supplementary file 1 [file egusphere-2025-2368-supplement.pdf]

Supplementary Materials

**Table S1. Site Descriptions**

| <b>Site Numbers, Zones, and Replicates</b> | <b>Zone Parameters</b>                                                                                    | <b>Number of Replicate Sample Points</b> | <b>Zone Size (km<sup>2</sup>)</b> | <b>Salinity (ppt)</b> | <b>Stem Counts (stems/m<sup>2</sup>)</b> | <b>Land Use Activities Nearby</b>                                                                                                             |
|--------------------------------------------|-----------------------------------------------------------------------------------------------------------|------------------------------------------|-----------------------------------|-----------------------|------------------------------------------|-----------------------------------------------------------------------------------------------------------------------------------------------|
| 1 Terrestrial                              | Presence of dry land, grass, trees, and/or rocks                                                          | 3 (A, B, C)                              | 0.04                              | 0.68                  | A: 39<br>B: 32<br>C: 46                  | Fresh water inflow from streams; agricultural and recreational activities (frisbee golf). Most inland/sheltered zone within a sheltered site. |
| 1 Intermittent                             | Presence of saturated soils, lack of aquatic vegetation, and/or presence of algal species on top of rocks | 3 (A, B, C)                              | 0.04                              | 0.68                  | A: 129<br>B: 80<br>C: 65                 | Fresh water inflow from streams; recreational activities (frisbee golf). Sheltered site.                                                      |
| 1 Littoral                                 | Presence of standing water, aquatic vegetation, and/or open water                                         | 3 (A, B, C)                              | 0.85                              | 0.68                  | A: 38<br>B: 15<br>C: 27                  | Fresh water inflow from streams; recreational activities (swimming, boating, frisbee golf). Most exposed zone within a sheltered site.        |

| <b>Site Numbers, Zones, and Replicates</b> | <b>Zone Parameters</b>                                                                                    | <b>Number of Replicate Sample Points</b> | <b>Zone Size (km<sup>2</sup>)</b> | <b>Salinity (ppt)</b> | <b>Stem Counts (stems/m<sup>2</sup>)</b> | <b>Land Use Activities Nearby</b>                  |
|--------------------------------------------|-----------------------------------------------------------------------------------------------------------|------------------------------------------|-----------------------------------|-----------------------|------------------------------------------|----------------------------------------------------|
| 2 Terrestrial                              | Presence of dry land, grass, trees, and/or rocks                                                          | 3 (A, B, C)                              | 0.04                              | 2.32                  | A: 27<br>B: 32<br>C: 29                  | Residential properties, farming, sheltered enclave |
| 2 Intermittent                             | Presence of saturated soils, lack of aquatic vegetation, and/or presence of algal species on top of rocks | 3 (A, B, C)                              | 0.02                              | 2.32                  | A: 57<br>B: 71<br>C: 53                  | Residential properties, farming, sheltered enclave |
| 2 Littoral                                 | Presence of standing water, aquatic vegetation, and/or open water                                         | 3 (A, B, C)                              | 0.20                              | 2.32                  | A: 11<br>B: 27<br>C: 20                  | Residential properties, sheltered enclave          |

| <b>Site Numbers, Zones, and Replicates</b> | <b>Zone Parameters</b>                                                                                    | <b>Number of Replicate Sample Points</b> | <b>Zone Size (km<sup>2</sup>)</b> | <b>Salinity (ppt)</b> | <b>Stem Counts (stems/m<sup>2</sup>)</b> | <b>Land Use Activities Nearby</b>                                                       |
|--------------------------------------------|-----------------------------------------------------------------------------------------------------------|------------------------------------------|-----------------------------------|-----------------------|------------------------------------------|-----------------------------------------------------------------------------------------|
| 3 Terrestrial                              | Presence of dry land, grass, trees, and/or rocks                                                          | 3 (A, B, C)                              | 0.08                              | 2.64                  | A: 20<br>B: 32<br>C: 28                  | Semi-sheltered reeds around active boating pier and dog park of the town of Tammissaari |
| 3 Intermittent                             | Presence of saturated soils, lack of aquatic vegetation, and/or presence of algal species on top of rocks | 3 (A, B, C)                              | 0.10                              | 2.64                  | A: 45<br>B: 46<br>C: 42                  | Semi-sheltered reeds around active boating pier and dog park of the town of Tammissaari |
| 3 Littoral                                 | Presence of standing water, aquatic vegetation, and/or open water                                         | 3 (A, B, C)                              | 0.45                              | 2.64                  | A: 108<br>B: 75<br>C: 57                 | Semi-sheltered reeds around active boating pier and dog park of the town of Tammissaari |

| <b>Site Numbers, Zones, and Replicates</b> | <b>Zone Parameters</b>                                                                                    | <b>Number of Replicate Sample Points</b> | <b>Zone Size (km<sup>2</sup>)</b> | <b>Salinity (ppt)</b> | <b>Stem Counts (stems/m<sup>2</sup>)</b> | <b>Land Use Activities Nearby</b>                                                         |
|--------------------------------------------|-----------------------------------------------------------------------------------------------------------|------------------------------------------|-----------------------------------|-----------------------|------------------------------------------|-------------------------------------------------------------------------------------------|
| 4 Terrestrial                              | Presence of dry land, grass, trees, and/or rocks                                                          | 3 (A, B, C)                              | 0.04                              | 5.14                  | A: 29<br>B: 53<br>C: 40                  | Long and exposed reed bed along western shore of Pojo Bay.                                |
| 4 Intermittent                             | Presence of saturated soils, lack of aquatic vegetation, and/or presence of algal species on top of rocks | 3 (A, B, C)                              | 0.03                              | 5.14                  | A: 25<br>B: 55<br>C: 49                  | Long and exposed reed bed along western shore of Pojo Bay. Nearby residential properties. |
| 4 Littoral                                 | Presence of standing water, aquatic vegetation, and/or open water                                         | 3 (A, B, C)                              | 0.10                              | 5.14                  | A: 93<br>B: 82<br>C: 73                  | Long and exposed reed bed along western shore of Pojo Bay.                                |

| <b>Site Numbers, Zones, and Replicates</b> | <b>Zone Parameters</b>                                                                                    | <b>Number of Replicate Sample Points</b> | <b>Zone Size (km<sup>2</sup>)</b> | <b>Salinity (ppt)</b> | <b>Stem Counts (stems/m<sup>2</sup>)</b> | <b>Land Use Activities Nearby</b>                                                 |
|--------------------------------------------|-----------------------------------------------------------------------------------------------------------|------------------------------------------|-----------------------------------|-----------------------|------------------------------------------|-----------------------------------------------------------------------------------|
| 5 Terrestrial                              | Presence of dry land, grass, trees, and/or rocks                                                          | 3 (A, B, C)                              | 0.02                              | 6.00                  | A: 13<br>B: 9<br>C: 10                   | Long and exposed reed bed along western shore of Pojo Bay. Next to shipping port. |
| 5 Intermittent                             | Presence of saturated soils, lack of aquatic vegetation, and/or presence of algal species on top of rocks | 3 (A, B, C)                              | 0.02                              | 6.00                  | A: 59<br>B: 27<br>C: 41                  | Long and exposed reed bed along western shore of Pojo Bay. Next to shipping port. |
| 5 Littoral                                 | Presence of standing water, aquatic vegetation, and/or open water                                         | 3 (A, B, C)                              | 0.08                              | 6.00                  | A: 217<br>B: 98<br>C: 81                 | Long and exposed reed bed along western shore of Pojo Bay. Next to shipping port. |

| <b>Site Numbers, Zones, and Replicates</b> | <b>Zone Parameters</b>                                                                                    | <b>Number of Replicate Sample Points</b> | <b>Zone Size (km<sup>2</sup>)</b> | <b>Salinity (ppt)</b> | <b>Stem Counts (stems/m<sup>2</sup>)</b> | <b>Land Use Activities Nearby</b>                                                                                                                                              |
|--------------------------------------------|-----------------------------------------------------------------------------------------------------------|------------------------------------------|-----------------------------------|-----------------------|------------------------------------------|--------------------------------------------------------------------------------------------------------------------------------------------------------------------------------|
| 6 Terrestrial                              | Presence of dry land, grass, trees, and/or rocks                                                          | 3 (A, B, C)                              | 0.01                              | 6.15                  | A: 35<br>B: 69<br>C: 66                  | Sheltered reed bed where Pojo Bay opens into the Baltic Sea. Nearby residential properties, boating pier, and marine biology research station.                                 |
| 6 Intermittent                             | Presence of saturated soils, lack of aquatic vegetation, and/or presence of algal species on top of rocks | 3 (A, B, C)                              | 0.003                             | 6.15                  | A: 136<br>B: 125<br>C: 174               | Sheltered reed bed where Pojo Bay opens into the Baltic Sea. Nearby residential properties, boating pier, and marine biology research station. Occasional goat grazing nearby. |
| 6 Littoral                                 | Presence of standing water, aquatic vegetation, and/or open water                                         | 3 (A, B, C)                              | 0.01                              | 6.15                  | A: 52<br>B: 25<br>C: 40                  | Sheltered reed bed where Pojo Bay opens into the Baltic Sea. Nearby residential properties, boating pier, and marine biology research station.                                 |

**Table S2. Soil Dry Bulk Density results per site and zone**

| Location         | DBD Average | SE   |
|------------------|-------------|------|
| Site 1 Avg       | 0.64        | 0.04 |
| Site 2 Avg       | 0.86        | 0.05 |
| Site 3 Avg       | 0.79        | 0.08 |
| Site 4 Avg       | 1.04        | 0.08 |
| Site 5 Avg       | 1.60        | 0.12 |
| Site 6 Avg       | 0.88        | 0.08 |
| Terrestrial Avg  | 1.11        | 0.06 |
| Intermittent Avg | 0.64        | 0.05 |
| Littoral Avg     | 1.07        | 0.04 |

**Table S3. Loss On Ignition results per site and zone**

| Location         | %OM average | SE  | Upper 10cm %OM Average | SE   |
|------------------|-------------|-----|------------------------|------|
| Site 1 Avg       | 15.1        | 2.4 | 41.8                   | 9.8  |
| Site 2 Avg       | 7.8         | 1.6 | 17.1                   | 5.5  |
| Site 3 Avg       | 11.8        | 2.5 | 21.3                   | 7.5  |
| Site 4 Avg       | 13.4        | 3.3 | 50.4                   | 8.2  |
| Site 5 Avg       | 7.4         | 2.6 | 18.9                   | 9.0  |
| Site 6 Avg       | 14.8        | 3.0 | 33.6                   | 9.2  |
| Terrestrial Avg  | 9.2         | 1.5 | 32.1                   | 5.8  |
| Intermittent Avg | 21.0        | 2.3 | 50.0                   | 5.3  |
| Littoral Avg     | 3.8         | 0.9 | 9.5                    | 3.8  |
| 1Ter             | 9.7         | 3.3 | 55.8                   | 7.3  |
| 1Int             | 26.1        | 4.5 | 65.5                   | 0.7  |
| 1Lit             | 4.0         | 0.3 | 4.0                    | 0.6  |
| 2Ter             | 3.9         | 2.3 | 13.1                   | 8.9  |
| 2Int             | 12.5        | 2.8 | 35.1                   | 2.9  |
| 2Lit             | 2.7         | 0.3 | 3.0                    | 0.7  |
| 3Ter             | 14.1        | 4.5 | 24.8                   | 14.9 |
| 3Int             | 13.6        | 4.1 | 23.3                   | 15.9 |
| 3Lit             | 5.8         | 4.0 | 15.9                   | 13.0 |
| 4Ter             | 8.8         | 3.8 | 45.4                   | 12.2 |
| 4Int             | 23.8        | 8.0 | 74.2                   | 0.5  |
| 4Lit             | 8.0         | 4.1 | 31.6                   | 13.8 |
| 5Ter             | 1.2         | 0.2 | 1.5                    | 0.4  |
| 5Int             | 23.4        | 7.4 | 54.4                   | 5.3  |
| 5Lit             | 0.5         | 0.1 | 0.7                    | 0.2  |
| 6Ter             | 14.7        | 3.7 | 51.7                   | 2.7  |
| 6Int             | 40.7        | 8.9 | 47.4                   | 15.4 |
| 6Lit             | 1.2         | 0.1 | 1.6                    | 0.2  |



**Table S4. Sediment C stock results per site and zone**

| Location         | Average C_g_sq_m | SE     |
|------------------|------------------|--------|
| Site 1 Avg       | 12147.0          | 2633.2 |
| Site 2 Avg       | 8436.0           | 1929.5 |
| Site 3 Avg       | 7280.0           | 1056.0 |
| Site 4 Avg       | 6299.0           | 957.3  |
| Site 5 Avg       | 5565.0           | 1054.0 |
| Site 6 Avg       | 7520.0           | 1932.2 |
| Terrestrial Avg  | 10438.1          | 1142.4 |
| Intermittent Avg | 11256.9          | 1716.9 |
| Littoral Avg     | 3952.6           | 444.5  |
| 1Ter             | 17480.7          | 642.9  |
| 1Int             | 24408.3          | 1607.4 |
| 1Lit             | 6697.0           | 738.7  |
| 2Ter             | 4352.3           | 1061.6 |
| 2Int             | 15948.3          | 892.1  |
| 2Lit             | 5006.0           | 558.9  |
| 3Ter             | 9235.0           | 1488.9 |
| 3Int             | 9040.3           | 647.3  |
| 3Lit             | 3564.3           | 618.2  |
| 4Ter             | 8759.0           | 1807.4 |
| 4Int             | 6475.3           | 631.3  |
| 4Lit             | 3663.3           | 903.5  |
| 5Ter             | 8064.7           | 423.2  |
| 5Int             | 7063.7           | 861.9  |
| 5Lit             | 1566.7           | 409.2  |
| 6Ter             | 14737.0          | 1360.2 |
| 6Int             | 4605.3           | 1761.9 |
| 6Lit             | 3218.0           | 548.4  |

**Table S5. Aboveground biomass C stock results per site and zone**

| Location         | Aboveground C_g_sq_m | SE   |
|------------------|----------------------|------|
| Site 1 Avg       | 80.4                 | 26.4 |
| Site 2 Avg       | 75.3                 | 18.5 |
| Site 3 Avg       | 90.5                 | 16.7 |
| Site 4 Avg       | 73.4                 | 16.9 |
| Site 5 Avg       | 83.0                 | 33.2 |
| Site 6 Avg       | 150.5                | 32.3 |
| Terrestrial Avg  | 70.0                 | 12.9 |
| Intermittent Avg | 122.3                | 19.7 |
| Littoral Avg     | 77.1                 | 15.1 |
| 1Ter             | 33.7                 | 5.1  |
| 1Int             | 180.5                | 26.3 |
| 1Lit             | 27.1                 | 9.9  |
| 2Ter             | 38.1                 | 4.6  |
| 2Int             | 148.3                | 8.1  |
| 2Lit             | 39.5                 | 6.1  |
| 3Ter             | 56.6                 | 15.7 |
| 3Int             | 77.4                 | 13.1 |
| 3Lit             | 137.5                | 33.9 |
| 4Ter             | 99.7                 | 22.6 |
| 4Int             | 24.6                 | 3.3  |
| 4Lit             | 96.0                 | 33.6 |
| 5Ter             | 36.7                 | 12.0 |
| 5Int             | 58.6                 | 4.7  |
| 5Lit             | 153.7                | 95.8 |
| 6Ter             | 155.0                | 41.1 |
| 6Int             | 244.9                | 37.2 |
| 6Lit             | 51.7                 | 9.9  |

**Table S6. Belowground biomass C stock results per site and zone**

| Location         | Belowground C_g_sq_m | SE     |
|------------------|----------------------|--------|
| Site 1 Avg       | 3439.1               | 992.9  |
| Site 2 Avg       | 3712.3               | 601.1  |
| Site 3 Avg       | 1936.7               | 898.1  |
| Site 4 Avg       | 1705.1               | 572.7  |
| Site 5 Avg       | 1984.7               | 872.4  |
| Site 6 Avg       | 1938.1               | 659.4  |
| Terrestrial Avg  | 1879.0               | 410.0  |
| Intermittent Avg | 4499.5               | 484.6  |
| Littoral Avg     | 188.5                | 31.1   |
| 1Ter             | 3154.7               | 521.0  |
| 1Int             | 6883.6               | 769.2  |
| 1Lit             | 279.0                | 8.5    |
| 2Ter             | 2289.4               | NA     |
| 2Int             | 4186.6               | 522.4  |
| 2Lit             | NA                   | NA     |
| 3Ter             | 162.4                | 44.6   |
| 3Int             | 5511.8               | 297.6  |
| 3Lit             | 135.8                | 35.9   |
| 4Ter             | 1717.3               | 655.3  |
| 4Int             | 3056.8               | 1287.9 |
| 4Lit             | 341.3                | 62.7   |
| 5Ter             | 421.5                | 104.6  |
| 5Int             | 5457.6               | 210.9  |
| 5Lit             | 75.0                 | 37.6   |
| 6Ter             | 3802.5               | 878.4  |
| 6Int             | 1900.4               | 1018.7 |
| 6Lit             | 111.4                | 23.8   |
